# Supplementary material
Source: Elsevier journal article supplement (https://www.sciencedirect.com/science/article/pii/S0212656721001116)
Supplement: mmc1 [file S0212656721001116:mmc1.doc]

**Appendix 1. Table 3. Multivariate mixed-effects regression Tobit model for total DHI-S score including patients with suspected vestibular migraine.**

|  |  | **Marginal Effet (95%CI)** | **p-value** |
| --- | --- | --- | --- |
| (Intercept) |  | -0.91 (-4.05, 2.20) | 0.596 |
| Treatment group | *Sham group* | (reference) |  |
|  | *Epley manoeuvre group* | -2.17 (-4.76, -0.33) | 0.035 |
| Baseline DHI-S score |  | 0.40 (0.27, 0.58) | <0.001 |
| Follow-up | *Week* | (reference) |  |
|  | *Month* | -2.61 (-6.38, 1.22) | 0.216 |
|  | *Year* | -2.40 (-7.86, 1.76) | 0.276 |
| Nystagmus at baseline |  | 1.75 (-0.40, 4.29) | 0.204 |
| Nystagmus at baseline  Follow-up | *Baseline nystagmus after 1 month* | -1.84 (-5.44, 1.28) | 0.292 |
|  | *Baseline nystagmus after 1 year* | -1.86 (-6.51, 2.89) | 0.318 |
| Baseline DHI-S score Follow-up | *Baseline DHI-S*  *after 1 month* | -0.08 (-0.29, 0.10) | 0.401 |
|  | *Baseline DHI-S*  *after 1 year* | -0.26 (-0.48, -0.02) | 0.011 |

**Final model built following stepwise backward selection of variables using the Akaike Information Criterion from an initial model featuring treatment adjusted for follow-up, baseline DHI-S score, sex, nystagmus at baseline, and three-way interactions between these factors and treatment and follow-up**

DHI-S =Dizziness Handicap Inventory – Screening version.
